# Supplementary material
Source: PubMed Central journal article supplement (PMC5951612)
Supplement: NIHMS961516-supplement-Supplemental.pdf [file NIHMS961516-supplement-Supplemental.pdf]

**SUPPLEMENTAL FIGURES**

**Figure S1.** Related to Figure 1.

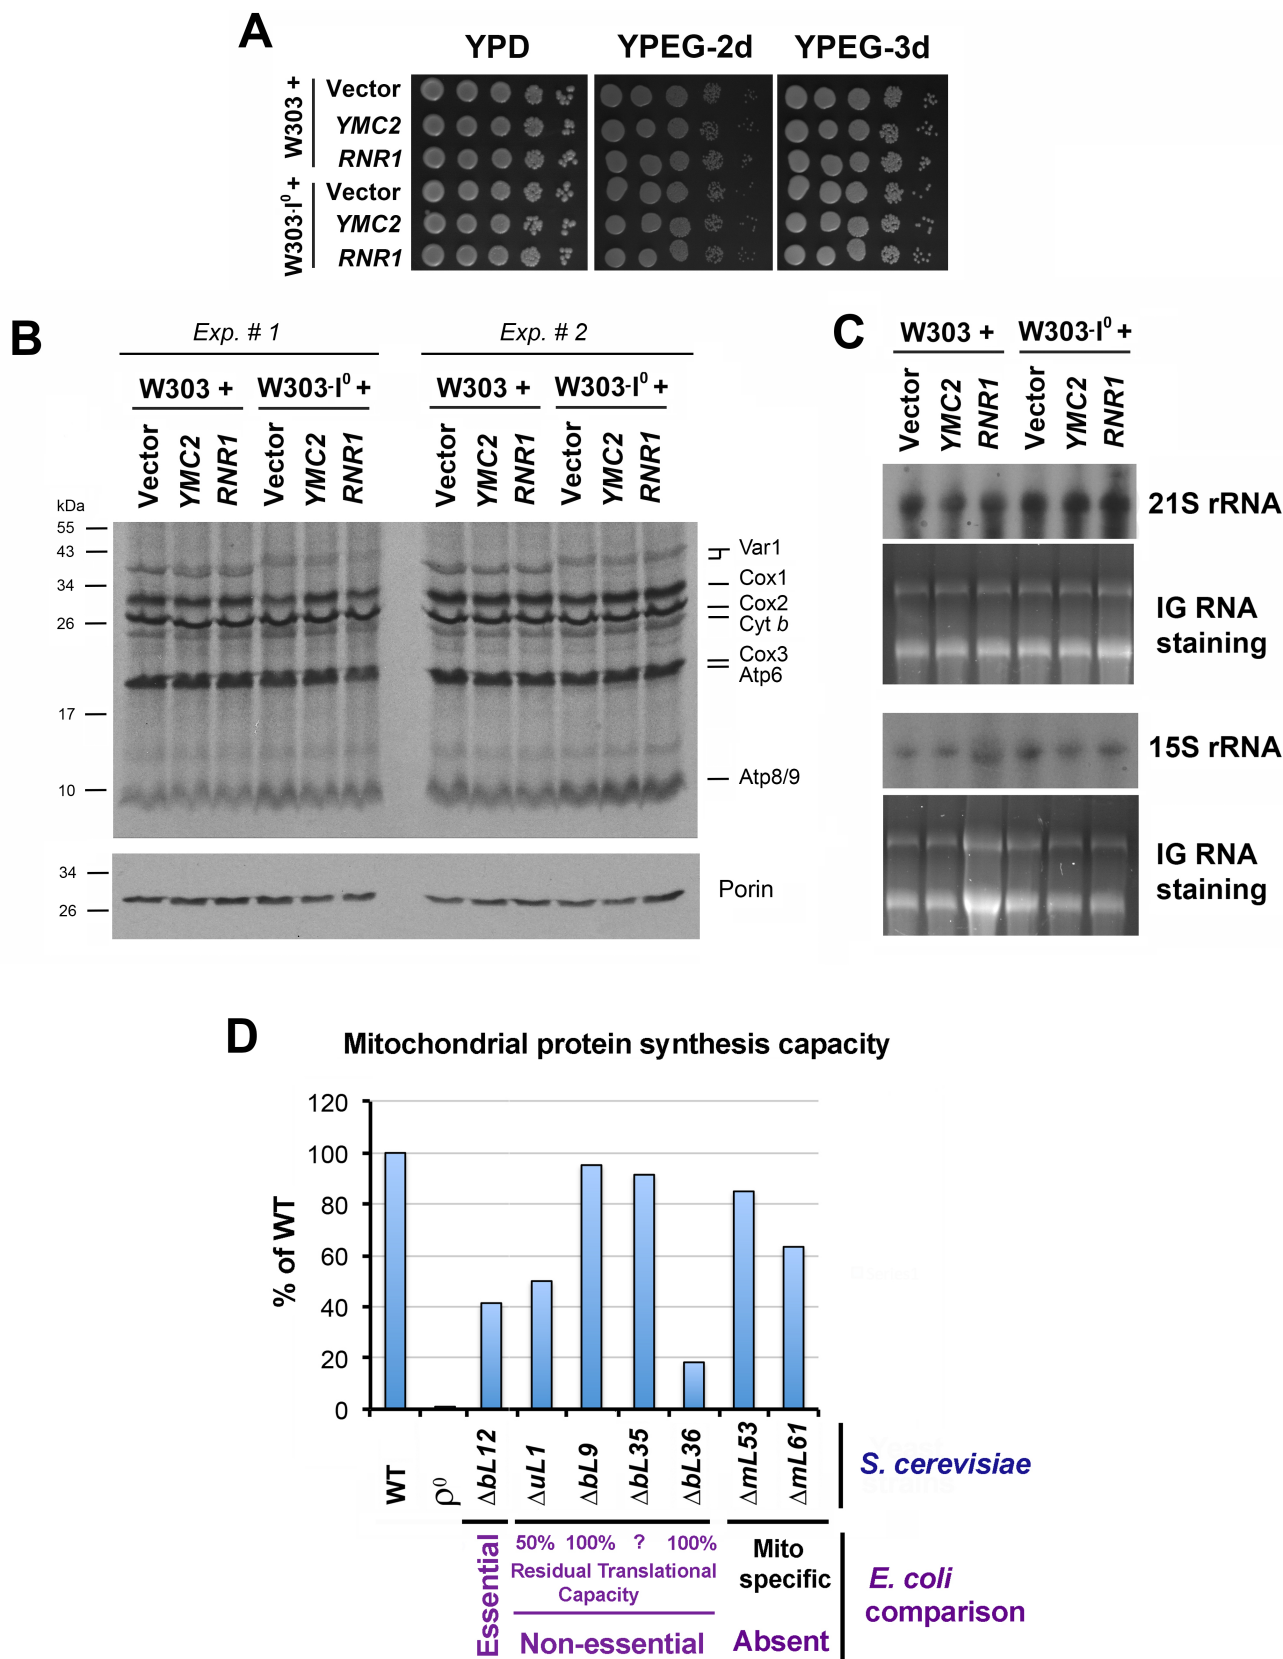

Supplemental Figure S2. Related to Figure 2.

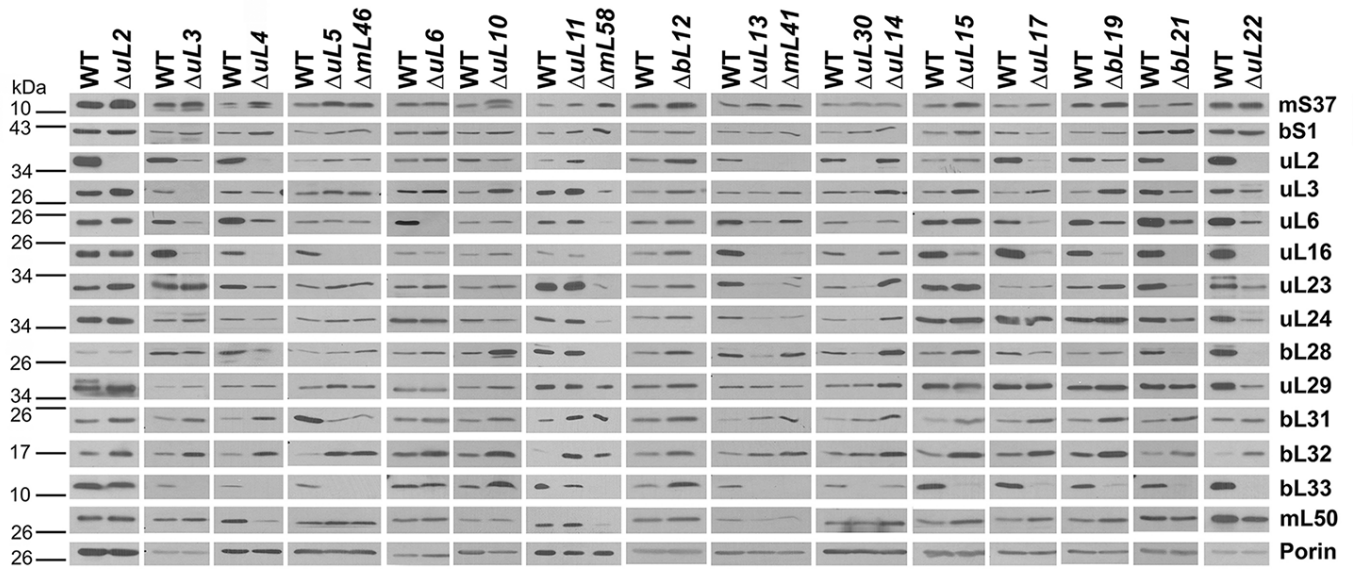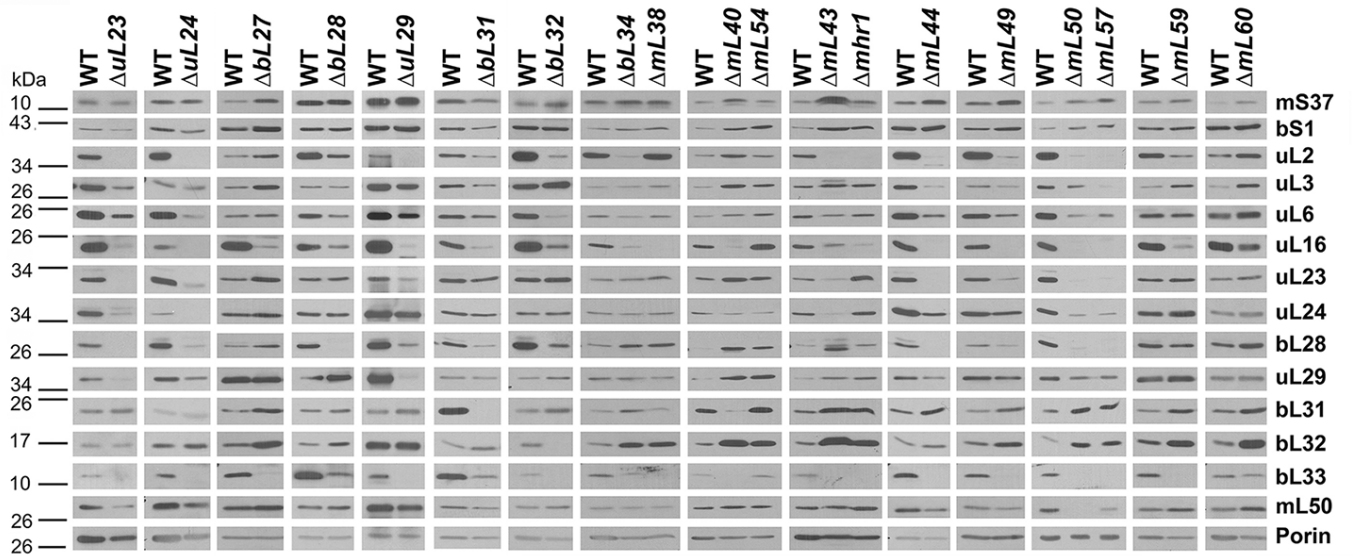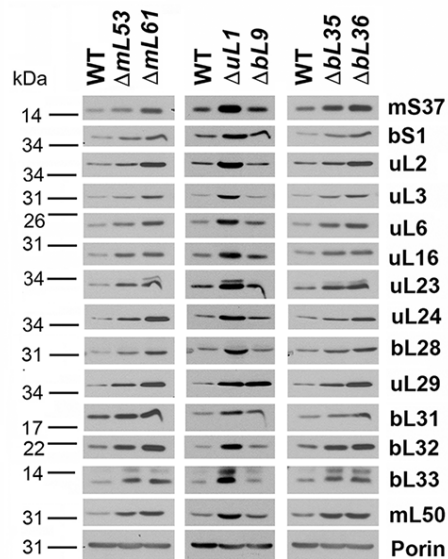

Supplemental Figure S3. Related to Figure 3.

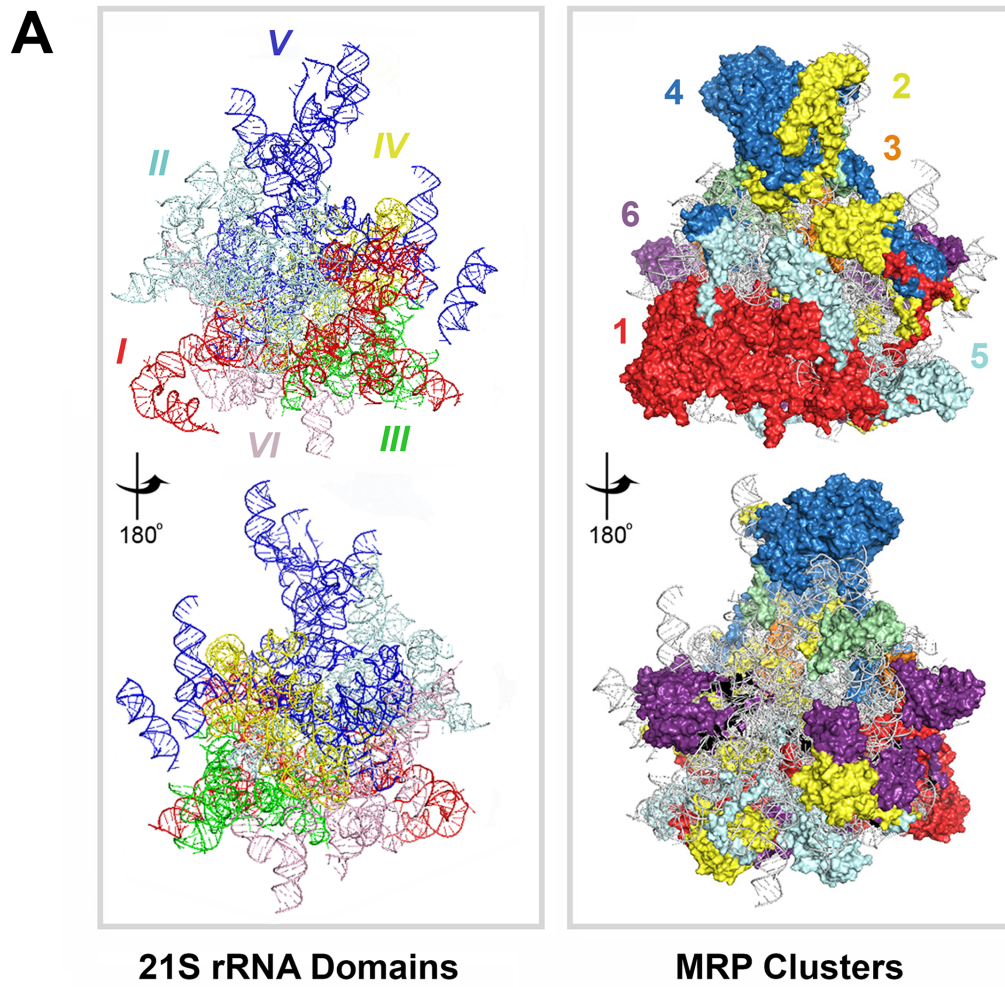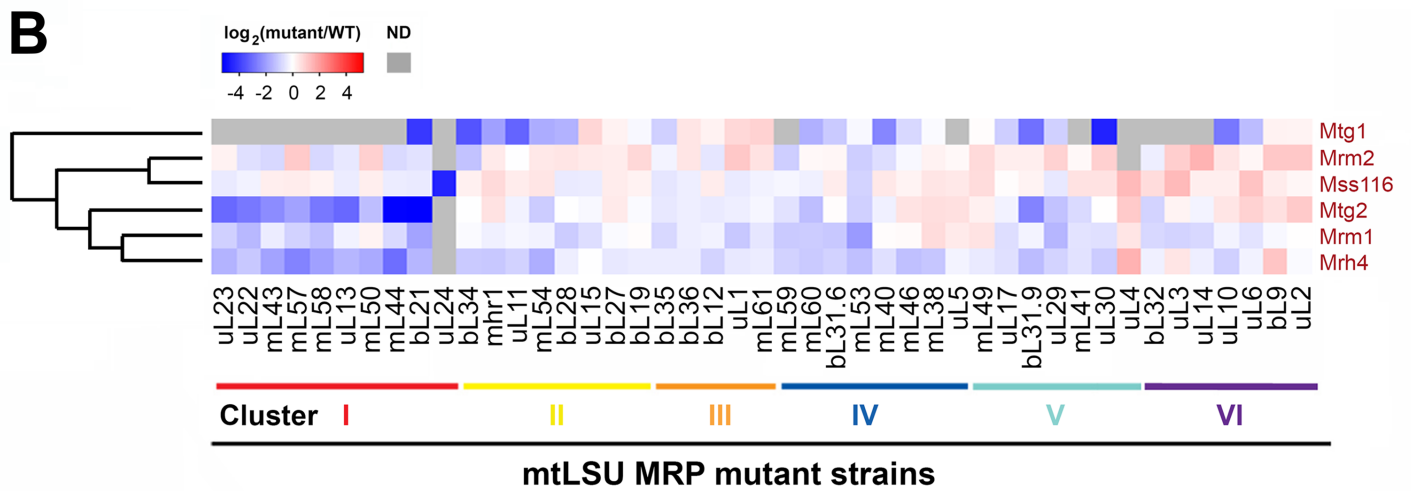

Supplemental Figure S4. Related to Figure 4.

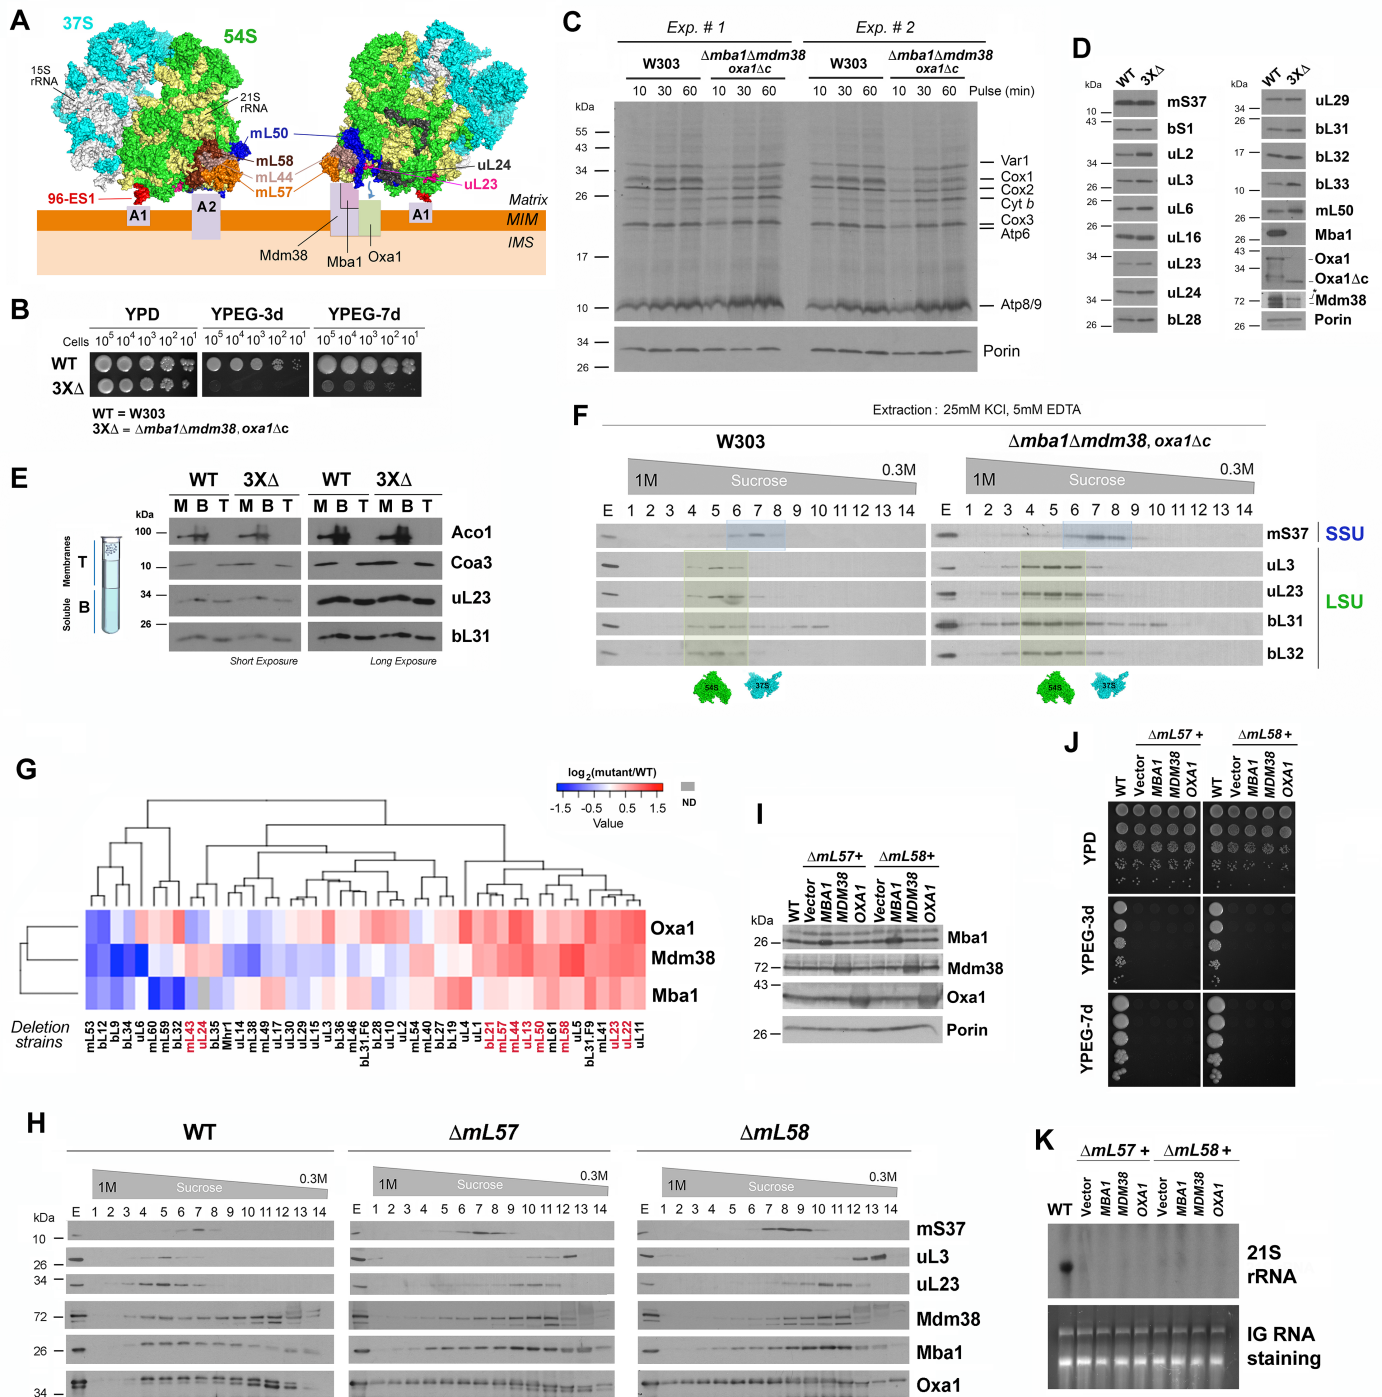



## SUPPLEMENTAL FIGURE LEGENDS

### **Supplemental Figure S1. Effect of genetic background on the phenotype of yeast mutant strains and quantification of the overall protein synthesis capacity in the non-essential yeast mutant strains.**

**Related to Fig. 1.**

**A-C.** Overexpression of *YMC2* or *RNR1* has no effect on cell growth, rRNA accumulation or mitochondrial translation:

**A.** Serial dilution growth test of wild type cells carrying intron-containing mtDNA (W303) or intron-less mtDNA (W303I<sup>0</sup>), with or without overexpression of *YMC2* or *RNR1*.

**B.** Metabolic labeling of newly synthesized mitochondrial translation products with <sup>35</sup>S-methionine in the presence of cycloheximide to inhibit cytoplasmic proteins synthesis. Immunoblotting with an anti-Porin antibody was used as a loading control.

**C.** Steady-state levels of 21S rRNA and 15S rRNA analyzed by northern blotting using total cellular RNA. In gel (IG) RNA staining image of the cellular ribosomal RNAs was used as a loading control.

**D.** Quantification of the overall protein synthesis capacity in the non-essential yeast mutant strains. Following radiolabel incorporation following 15min pulse with <sup>35</sup>S-methionine, the proteins were separated by SDS-PAGE, transferred to a nitrocellulose membrane and exposed to X-ray film (**Fig 1C**). To quantify the incorporation of radiolabel into newly synthesized proteins, the images were digitalized, and densitometric analyses of overall signal per line was performed using the histogram function of the Adobe Photoshop program. The results from two independent experiments did not differ by more than 5%. In the bottom part of the figure, the results are compared with what is known for mutants of the homolog proteins in *E. coli*.

### **Supplemental Figure S2. Steady-state levels of mitoribosome proteins in WT and MRP mutant strains. Related to Fig. 2.**

Immunoblot analyses of the steady-state levels of the indicated MRP proteins in WT and a selection of MRP mutant strains. Porin was used as loading control.

### **Figure S3. Mapping of protein clusters on the 21S rRNA structure and presence of assembly factors in mitoribosome subassemblies. Related to Fig. 3.**

**A.** Structural tertiary domains of 21S rRNA and location of the protein clusters identified. Six domains of 21S rRNA were mapped to the mtLSU structure (PDB-3J6B (Amunts et al., 2014)). The RNA domains are numbered in Roman numerals and the protein clusters in Arabic numbers.

**B.** Hierarchical cluster analyses of levels of assembly factors in assembly intermediates accumulated in the mutant strains. Following analysis by mass spectrometry of the mtLSU intermediates that accumulate in the mtLSU mutant strains (**Fig. 3**), the abundance in each intermediate of five known 54S assembly factors was

considered in a hierarchical cluster analysis. These assembly factors are the 21S rRNA methyltransferases Mrm1 and Mrm2, the DEAD-box helicases Mss116 and Mrh4, and the GTPases Mtg1 and Mtg2. ND, not detected.

**Supplemental Figure S4. Mba1, Mdm38 and Oxa1 are not essential for mitoribosome biogenesis. Related to Fig. 4.**

**A-F.** Mba1, Mdm38 and Oxa1 are not essential for the anchoring of yeast mitoribosomes to membrane.

**A.** Two contact or anchoring sites (A1 and A2) between yeast mitoribosomes and the inner membrane where recently identified by cryoelectron tomography (Pfeffer et al., 2015) are depicted here, using a modified cartoon of the yeast mitoribosome structure (PDB 5mrc; (Desai et al., 2017)). The two distinct membrane contact sites are formed by the 21S rRNA expansion segment 96-ES1, labeled in red (A1) and the inner membrane protein Mba1 (A2). Because Mba1 has been shown to interact with Mdm38 and Oxa1, the three proteins are presented in contact, for simplification. mtSSU (37S) proteins are colored in cyan. Most proteins in the mtLSU (54S) are labeled in green color, except those that form part of the membrane facing protuberance, our Cluster 1 proteins, which are color-coded. A blue arrow indicates the tunnel exit opening. MIM, mitochondrial inner membrane; IMS, intermembrane space.

**B.** Serial dilution growth test of WT (W303) and a triple mutant strain  $\Delta mba1\Delta mdm38,oxa1\Delta c$  (3X $\Delta$ ) obtained from Dr. J. Herrmann, that was not characterized previously. The triple deletion strain lacks Mdm38, Mba1, and the C-terminal 71 residues of Oxa1 (Oxa1<sup>1-331</sup> or *oxa1* $\Delta$ C) and was constructed as reported (Bauerschmitt et al., 2010).

**C.** Metabolic labeling of newly synthesized mitochondrial translation products in the indicated strains, following 10, 30 and 60 min pulses with <sup>35</sup>S-methionine in the presence of cycloheximide to inhibit cytoplasmic protein synthesis. Immunoblotting for Porin was used as a loading control. Two experiments are presented.

**D.** Immunoblot analyses of the steady-state levels of the indicated mitoribosome proteins, Mba1, Mdm38 and Oxa1 in WT and  $\Delta mba1\Delta mdm38,oxa1\Delta c$  (3X $\Delta$ ) strain. Porin was used as loading control. \*unspecific band.

**E.** Mitochondria of the indicated strains were fractionated into membrane (half top of the gradient -T) and soluble (half bottom of the gradient -B) proteins by sonication with freeze-thawing and flotation. M: total mitochondria extract. Proteins of these fractions were analyzed by immunoblotting. Markers of soluble (Aco1) and integral membrane proteins (Coa3) were used as controls. Two exposures of the films are presented.

**F.** Sucrose gradient sedimentation analyses of mt-SSU and mt-LSU proteins in mitochondrial extracts from the indicated strains, prepared in the presence of 25 mM KCl, 5mM EDTA and 0.8% Triton X-100. Blue and green transparent colors mark the fractions where the mtSSU and mtLSU sediments, respectively.

**G-K.** Overexpression of the mitoribosome membrane anchoring proteins Mba1, Mdm38 or Oxa1 does not restore 21S rRNA stability of mitoribosome assembly in the  $\Delta mL57$  and  $\Delta mL58$  strains.

- G.** Hierarchical cluster analyses of levels of Mba1, Mdm38 and Oxa1 in assembly intermediates accumulated in the mutant strains, performed as in Fig. 3 and S4. ND, not detected.
- H.** Sucrose gradient sedimentation analyses of Mba1, Mdm38, Oxa1 and markers of the mt-SSU (mS37) and mt-LSU (uL3 and uL23), in mitochondrial extracts from the indicated strains. The extracts were prepared in the presence of 0.8% Triton X-100, 25mM KCl and 5mM EDTA to force the dissociation of mitoribosome subunits.
- I.** Immunoblot analyses of the steady-state levels of Mba1, Mdm38 and Oxa1 in the indicated strains overexpressing each of the proteins from episomal constructs. Porin was used as a loading control.
- J.** Serial dilutions growth test of WT (W3031<sup>0</sup>), and mutant strains  $\Delta mL57$  and  $\Delta mL58$  carrying an empty vector or constructs for overexpression of *MBA1*, *MDM38*, or *OXA1*.
- K.** Steady-state levels of 21S rRNA analyzed by northern blotting using total cellular RNA. In gel (IG) RNA staining image of the cellular ribosomal RNAs was used as a loading control.

## SUPPLEMENTAL TABLES

**Supplemental Table 1. List of *S. cerevisiae* mitoribosomal LSU proteins. Related to Fig. 1.** The recently proposed nomenclature, the old traditional nomenclature and the bacterial homolog are presented for comparison. Respiratory growth phenotypes and mtDNA retention after 20 generations for the MRP mutant strains are listed. Conserved proteins are in red, those common to other mitochondria in blue and proteins specific to yeast mitochondria in green.

| <i>S. cerevisiae</i> mtLSU proteins |          | Bacterial homolog | Null mutant phenotype   |                             |
|-------------------------------------|----------|-------------------|-------------------------|-----------------------------|
| New Name                            | Old name |                   | Respiration (~ % of WT) | Percentage rho <sup>+</sup> |
| uL1                                 | Mrp1     | L1                | 67.92±5.73              | 100                         |
| uL2                                 | Rml2     | L2                | 0                       | 79                          |
| uL3                                 | Mrp19    | L3                | 0                       | 70                          |
| uL4                                 | Yml6     | L4                | 0                       | 67.80                       |
| uL5                                 | Mrp17    | L5                | 0                       | 87.70                       |
| uL6                                 | Mrp16    | L6                | 0                       | 72.30                       |
| bL12                                | Mnp1     | L7/12             | 27.17±1.43              | 91.80                       |
| bL9                                 | Mrp150   | L9                | 97.19±3.31              | 100                         |
| uL10                                | Mrp11    | L10               | 0                       | 63.80                       |
| uL11                                | Mrp19    | L11               | 0                       | 67.50                       |
| uL13                                | Mrp123   | L13               | 0                       | 55.20                       |
| uL14                                | Mrp138   | L14               | 0                       | 89.20                       |
| uL15                                | Mrp110   | L15               | 0                       | 80                          |
| uL16                                | Mrp16    | L16               |                         |                             |
| uL17                                | Mrp18    | L17               | 0                       | 45.50                       |
| bL19                                | Img1     | L19               | 0                       | 69.70                       |
| bL21                                | Mrp149   | L21               | 0                       | 70.80                       |
| uL22                                | Mrp122   | L22               | 0                       | 77.30                       |
| uL23                                | Mrp20    | L23               | 0                       | 91.10                       |
| uL24                                | Mrp140   | L24               | 0                       | 72                          |
| bL27                                | Mrp7     | L27               | 0                       | 60                          |
| bL28                                | Mrp124   | L28               | 0                       | 50                          |
| uL29                                | Mrp14    | L29               | 0                       | 100                         |
| uL30                                | Mrp133   | L30               | 0                       | 87.80                       |
| bL31                                | Mrp136   | L31               | 0                       | 54.70                       |
| bL32                                | Mrp132   | L32               | 0                       | 69.50                       |
| bL33                                | Mrp139   | L33               |                         |                             |
| bL34                                | Mrp134   | L3                | 0                       | 51.20                       |
| bL35                                | Ynl122c  | L35               | 96.65±2.28              | 100                         |
| bL36                                | Rtc6     | L36               | 46.01±4.49              | 100                         |
| mL38                                | Mrp135   | -                 | 0                       | 65.30                       |
| mL40                                | Mrp128   | -                 | 0                       | 63                          |
| mL41                                | Mrp127   | -                 | 0                       | 61.70                       |
| mL43                                | Mrp151   | -                 | 0                       | 51.80                       |
| mL44                                | Mrp13    | -                 | 0                       | 50.50                       |
| mL46                                | Mrp117   | -                 | 0                       | 82.40                       |
| mL49                                | Img2     | -                 | 0                       | 42.80                       |
| mL50                                | Mrp113   | -                 | 0                       | 71.10                       |
| mL53                                | Mrp144   | -                 | 77.08±2.99              | 100                         |
| mL54                                | Mrp137   | -                 | 0                       | 48.90                       |
| mL57                                | Mrp115   | -                 | 0                       | 67.30                       |
| mL58                                | Mrp120   | -                 | 0                       | 64.60                       |
| mL59                                | Mrp125   | -                 | 0                       | 54                          |
| mL60                                | Mrp131   | -                 | 0                       | 81.80                       |
| mL61                                | Mrp49    | -                 | 34.52±1.20              | 100                         |
| Mhr1                                | Mhr1     | -                 | 0                       | 47.40                       |



**Supplemental Table S2. Primers used for creation of MRP mutant strains. Related to Key Resources.**

| Gene        | Forward (5'-3')                                                                                                                                                                        | Reverse (5'-3')                                                                                                                                                                       |
|-------------|----------------------------------------------------------------------------------------------------------------------------------------------------------------------------------------|---------------------------------------------------------------------------------------------------------------------------------------------------------------------------------------|
| <i>ul1</i>  | CGACCCAGAATCACTTGC                                                                                                                                                                     | GCTCTGCCAGCCTCAATC                                                                                                                                                                    |
| <i>ul2</i>  | CAGTGTTTGTGTTGTAATAACAG                                                                                                                                                                | GTGAAACATTGGTTGCTGATC                                                                                                                                                                 |
| <i>ul3</i>  | CTATGAAACCTCGCTATAAGC                                                                                                                                                                  | GCACTTTGAGGGACTTTTTG                                                                                                                                                                  |
| <i>ul4</i>  | CGTACCCAACAACCTCG                                                                                                                                                                      | CGGAGACGAGTTCTTTGC                                                                                                                                                                    |
| <i>ul5</i>  | GAATTGACGCATTACCTC                                                                                                                                                                     | GGACAAGGTTTGGCTCTG                                                                                                                                                                    |
| <i>ul6</i>  | CCTCCTACAGATGGCACTAAC                                                                                                                                                                  | GTCCACCATACCCTGAAATTC                                                                                                                                                                 |
| <i>bl12</i> | GAAGGAACAGGACAAGCAGCCCCTCAGCAGCAAACACAGTC<br>AATTAATAAGCGCCAGTCGTACGCTGCAGGTCGAC (set 1)<br>GTCTTGAAGTCCAATAAAAACAACTCAAATAATGGCAAACAA<br>GAACTCGGTAAGTTCTGGAAGGAACAGGACAAGCAG (set 2) | CTCGAAGAGAAAACAGACTATTTTGATTAACACGATTGGTA<br>GATTGCTACAGTTTTAAAATCGATGAATTCGAGCTCG (set<br>1)<br>GGCAGGACGAAAAGAATAAAGAGTTAAACATATTTACA<br>TGATATTTCTTATTTTCTCGAAGAGAAAACAGAC (set 2) |
| <i>bl9</i>  | CTCGGAATCCACCAGTTG                                                                                                                                                                     | CTACGATGGGTTCACTCAAG                                                                                                                                                                  |
| <i>ul10</i> | CCTGATTAACCATTGCCTAC                                                                                                                                                                   | GGGAGATACTGGTACTCTAAC                                                                                                                                                                 |
| <i>ul11</i> | GTTAGAGGAGAAGACCATCATC                                                                                                                                                                 | GCCACTTACGACGACGAG                                                                                                                                                                    |
| <i>ul13</i> | GCACCTTACTGTAGAAGCACC                                                                                                                                                                  | GGGTAACAAGTAGGCAATAG                                                                                                                                                                  |
| <i>ul14</i> | CGATTGACTTGATAAGAGGTG                                                                                                                                                                  | GGCATTATCTTTGGAAAGTAGC                                                                                                                                                                |
| <i>ul15</i> | GCCAGTCATTGGGTTATTG                                                                                                                                                                    | GGTTAAGGCGTGCGACTG                                                                                                                                                                    |
| <i>ul17</i> | CGCAAAGCCTATTGATGG                                                                                                                                                                     | GTGAGTTCATCTGGGAGCG                                                                                                                                                                   |
| <i>bl19</i> | GGGAGGCAAAGACAAGGAG                                                                                                                                                                    | CCTGAAGTTGGGCACAATATC                                                                                                                                                                 |
| <i>bl21</i> | CTTCCCAATGCTCTTCTAC                                                                                                                                                                    | CGATAACTGGCGTGCTTTC                                                                                                                                                                   |
| <i>ul22</i> | GGGTTCACTACTCAAGGTGG                                                                                                                                                                   | CTTTGCCAGATGCTGTCACC                                                                                                                                                                  |
| <i>ul23</i> | CCGAATTTACCCGTACACG                                                                                                                                                                    | CCAAAGTCTCGCACAGCAG                                                                                                                                                                   |
| <i>ul24</i> | GACCATAATAACCACCATTTG                                                                                                                                                                  | GCCTGGCTAACGTTCTGG                                                                                                                                                                    |
| <i>bl27</i> | GGCGTTCTATCTGCTCATT                                                                                                                                                                    | CGTCCGATCATTACGTGAG                                                                                                                                                                   |
| <i>bl28</i> | GTGACGATGAAGTAGTAAAGGAGAG                                                                                                                                                              | GATTAATGACCAATGGAAATAGC                                                                                                                                                               |
| <i>ul29</i> | CCCTTTGTTTTCTCCTCCTC                                                                                                                                                                   | GATTTTGGCACAGCATAACG                                                                                                                                                                  |
| <i>ul30</i> | GCACGAACCTTAGCGATATG                                                                                                                                                                   | GCAGAACGGATTTACTGGATG                                                                                                                                                                 |
| <i>bl31</i> | CTCAGAAGAGGGAATGGG                                                                                                                                                                     | GTACGTGATAAGTATCGCAGC                                                                                                                                                                 |
| <i>bl32</i> | CAAATGTGAGGCAAATAACG                                                                                                                                                                   | CTACTTCTGATGCGGCTAAG                                                                                                                                                                  |
| <i>bl34</i> | CACGGAAAGTGATAGTGAAGC                                                                                                                                                                  | GGTACGGTGAGTGATGATATAAG                                                                                                                                                               |
| <i>bl35</i> | GGTCTGATCCAGTATTGGCTA                                                                                                                                                                  | CATCACGCACAAATGGATTG                                                                                                                                                                  |
| <i>bl36</i> | CATAGTCTGCCCTCATTCCG                                                                                                                                                                   | CATCAATCTGGTGTCAAGTCC                                                                                                                                                                 |
| <i>mL38</i> | GATTATCATCGCCCGCTG                                                                                                                                                                     | GAATACGCCAAGCTACACCC                                                                                                                                                                  |
| <i>mL40</i> | GTCGTTTCATCGGCTTCG                                                                                                                                                                     | GGGAAACAACTTGTGGTAGTC                                                                                                                                                                 |
| <i>mL41</i> | CAGGGTTGTTCCGGTTTCTC                                                                                                                                                                   | CAGGTTCTCTGCTCGTG                                                                                                                                                                     |
| <i>mL43</i> | GAATGCGATTGGAGAAGC                                                                                                                                                                     | GTATTTCCGGATGAACAGG                                                                                                                                                                   |
| <i>mL44</i> | GGCACATTCACATTAGACG                                                                                                                                                                    | CCATTGAGACTCTGCTTCATTAC                                                                                                                                                               |
| <i>mL46</i> | CAACAGCAGCAGCAACAAC                                                                                                                                                                    | CTGCGGTAACAACACTAGACG                                                                                                                                                                 |
| <i>mL49</i> | CTTTCTGTTGACCTCCCTGG                                                                                                                                                                   | GGACCTGATTCTAACACCTCG                                                                                                                                                                 |
| <i>mL50</i> | GCACTCCTTTGCTTCCCTC                                                                                                                                                                    | CACAGTAACGCATGACCG                                                                                                                                                                    |
| <i>mL53</i> | GTGCCTCTAAGTTTGCCG                                                                                                                                                                     | CTAACTCGCAAGGCTTGTC                                                                                                                                                                   |
| <i>mL54</i> | CGAGGTGATACTGACCGAAG                                                                                                                                                                   | CTTTCTTGTGAGCGTCTTC                                                                                                                                                                   |
| <i>mL57</i> | CCATCTCATCTGTGTAGATC                                                                                                                                                                   | CTGGATTTAGGCGAGCACTG                                                                                                                                                                  |
| <i>mL58</i> | GGAGAATCTAGCTCATCTTC                                                                                                                                                                   | CCATTAGCAGCAGCAATTGG                                                                                                                                                                  |
| <i>mL59</i> | GGACTCTTTGCACGAGACG                                                                                                                                                                    | CCACCGAGAACCATCATGTG                                                                                                                                                                  |
| <i>mL60</i> | CCTTAGCACAACTGCCATTGC                                                                                                                                                                  | CCACTAACTGTCTTACCTC                                                                                                                                                                   |
| <i>mL61</i> | GAACCACCAATCCAACAG                                                                                                                                                                     | GGTAGGACTATTACTAGCACCAC                                                                                                                                                               |
| <i>MHR1</i> | CTACTTAAACGCCTTCAATCG                                                                                                                                                                  | CAGTAAAGACGAAGACCCG                                                                                                                                                                   |
